# Supplementary material
Source: MDPI journal article supplement (https://www.mdpi.com/2673-4931/4/1/22)

# Meteorological characteristics associated to air pollution in Bucharest Greater Area, Romania

T. Hriscan<sup>1,2</sup>, S. Chirita<sup>1</sup>, M. Burcea<sup>1,2</sup>, A. Calcan<sup>3</sup>, M. Corbu<sup>1,3</sup>, G. Iorga<sup>1,4</sup>

(1) University of Bucharest, Faculty of Physics, (2) National Meteorological Administration, (3) National Institute for Aerospace Research 'Elie Carafoli' INCAS, Environmental Aerodynamics, (4) University of Bucharest, Dept. of Physical Chemistry (tiberiu.hriscan@gmail.com)

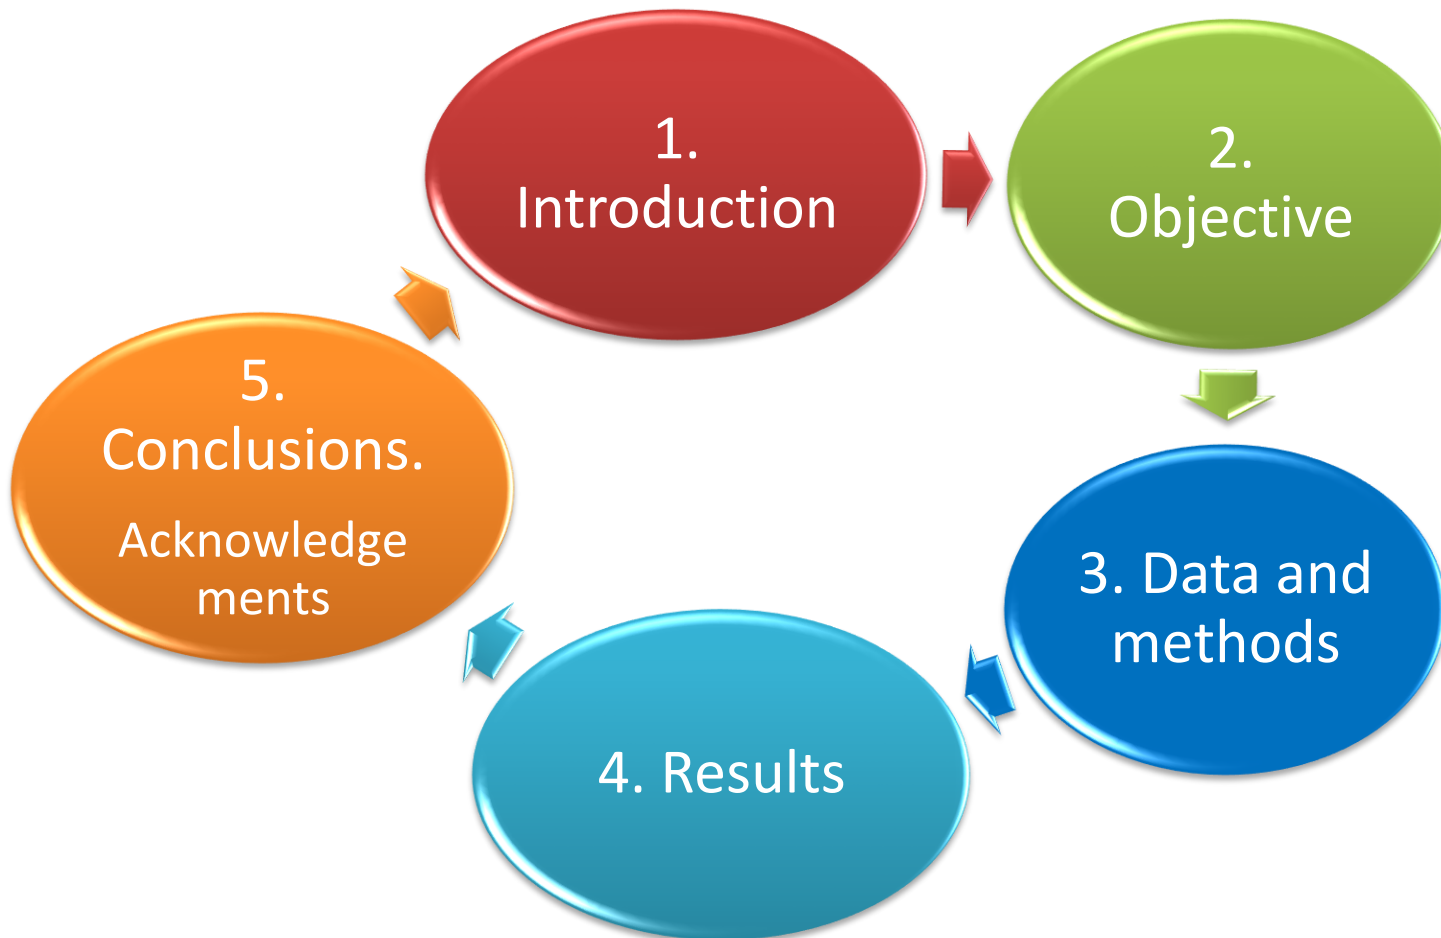

## Navigation

- The orange arrow (horizontal) takes you to the next slide
- The orange arrow (vertical) takes you to the section menu

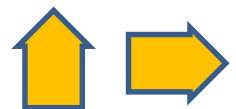

# Introduction

## Observation:

lowest  $PM_{10}$  and  $PM_{2.5}$  in 2016 were correlated with intense precipitation events

Example: Bucharest and Prahova Region, 17-20.06.2016

| Percentile   | $PM_{2.5}$<br>( $\mu\text{g m}^{-3}$ ) | $PM_{10}$<br>( $\mu\text{g m}^{-3}$ ) |
|--------------|----------------------------------------|---------------------------------------|
| Minimum      | 9.09                                   | 10.9                                  |
| P25          | 12.54                                  | 22.17                                 |
| P50 (Median) | 15.81                                  | 27.44                                 |
| P75          | 20.72                                  | 33.26                                 |
| Maximum      | 47.78                                  | 75.95                                 |

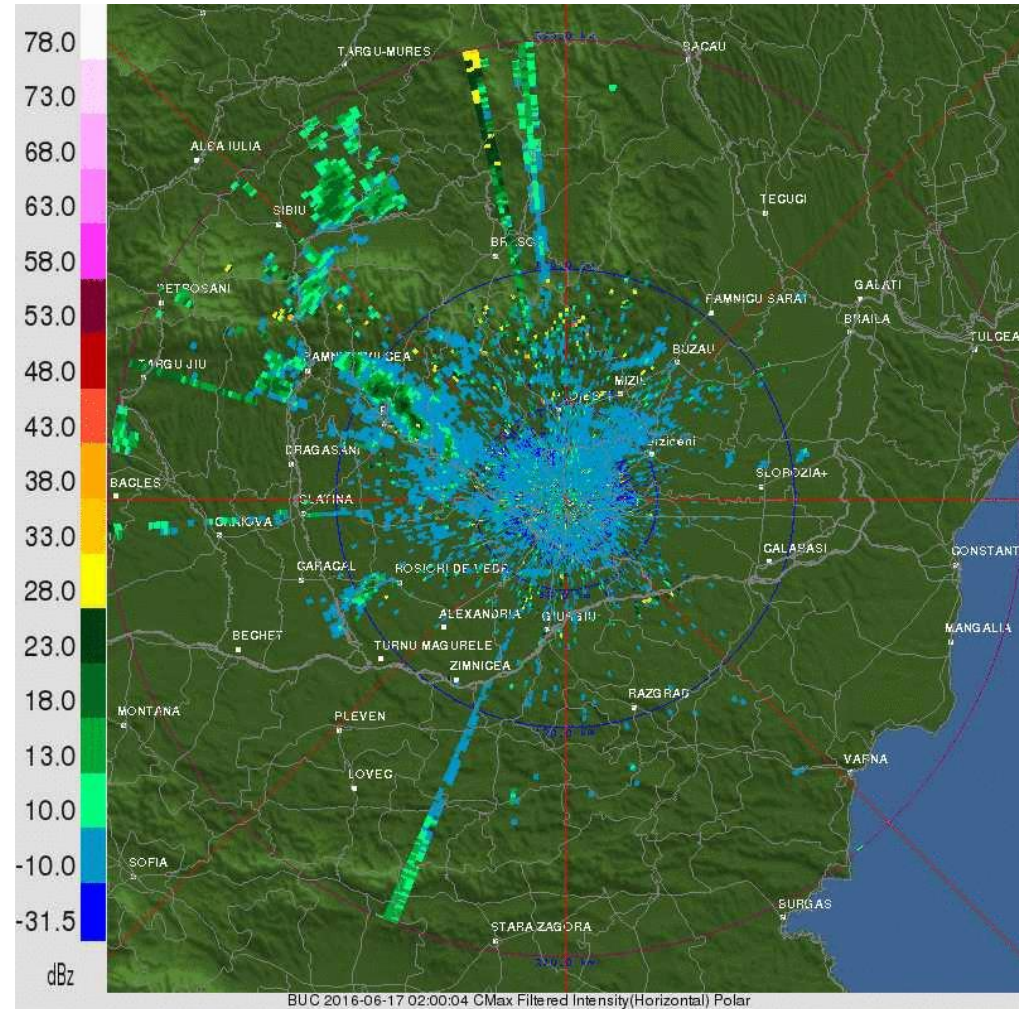

(Chiritescu, Hriscan et al.,  
Geophys. Res. Abs. 21, 2019)

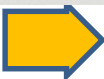

# Introduction

## Bucharest Greater Area (44° 26'N, 26° 06'E)

Located in open plain; surface of about 285 km<sup>2</sup>; altitudes: 56 m a.s.l. (SE) to 92 m a.s.l. (W); relatively round shape.

### Main Pollution Sources

- Industrial → **electro-thermal power stations (CETs)**
- Traffic – mixed vehicle fleet (non-EURO ÷ EURO6)
- Construction sites
- Residential heating sources
- Various points/areas where domestic waste is collected and stored
- Plenty of agricultural activities in the peri-urban area

**Low ventilation coefficient**  
(Manolache et al., 2019)

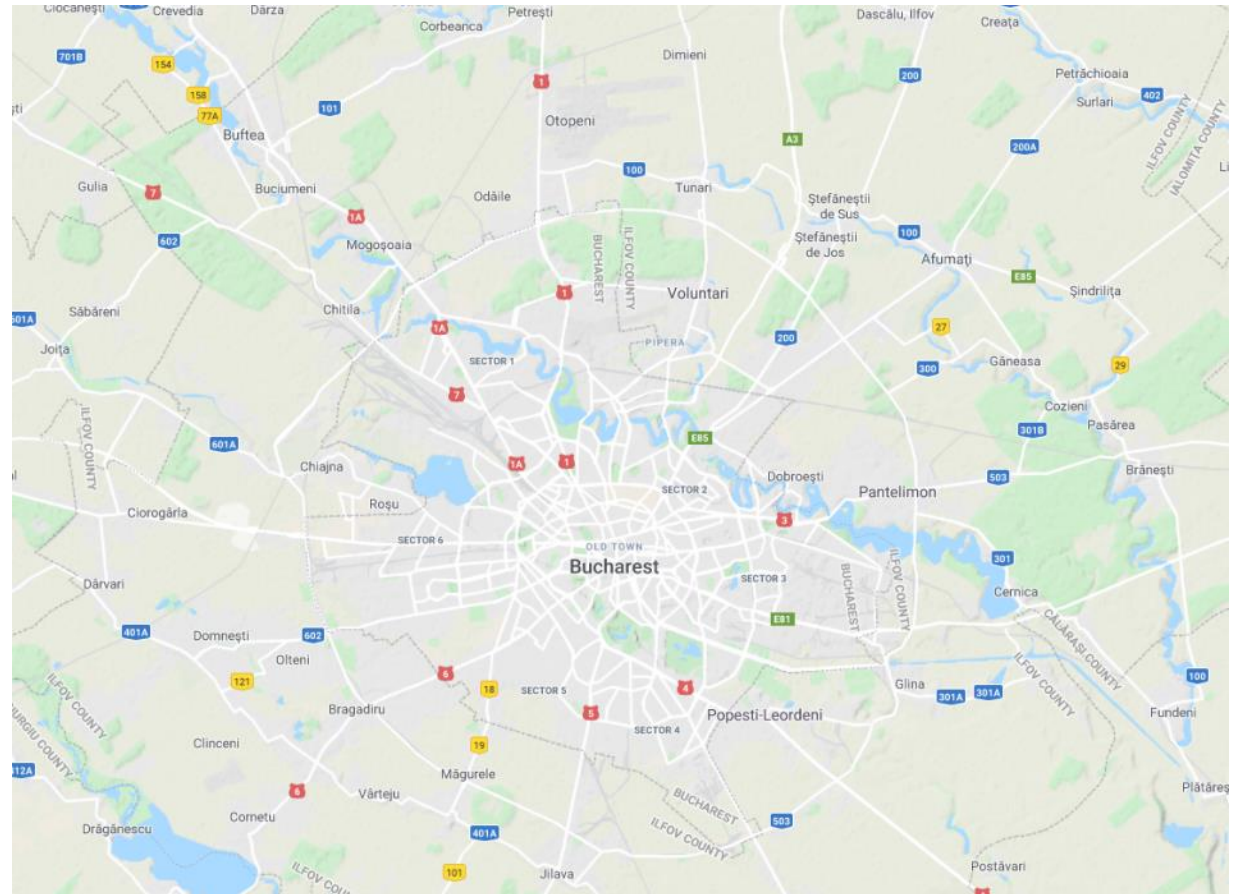

Fig. 1 Map created using [www.google.com/maps](http://www.google.com/maps)

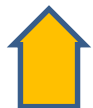

## Objective

This study examines how the concentrations of particulate matter with an aerodynamic diameter below 10  $\mu\text{m}$  ( $\text{PM}_{10}$ ) and below 2.5  $\mu\text{m}$  ( $\text{PM}_{2.5}$ ) and main gaseous pollutants ( $\text{NO}_x$ ,  $\text{O}_3$ ,  $\text{SO}_2$ ,  $\text{CO}$ ,  $\text{C}_6\text{H}_6$ ) might be linked with precipitation characteristics using an observational data set for three years (2015-2019) in Bucharest metropolitan area:

- Estimation of the scavenging coefficient  $\Lambda$  of particulate matter
- Link of  $\Lambda$  with rainfall category during the annual convective periods.
- Possible link between reduced air pollution and meteorological phenomena and the air mass history.

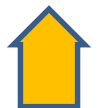

# Data and methods

Surface data  
PM<sub>10</sub> and PM<sub>2.5</sub> mass concentrations

Bucharest, DATABASE  
Multiple sources  
2015-2019

RADAR data  
Images, Reflectivity,  
Echotops

Synoptic meteorology  
Backward air mass trajectories

*In-situ* meteorology  
(T, p, RH, WS, WD)

Variations of PM<sub>10</sub>, PM<sub>2.5</sub>, NO<sub>x</sub>, O<sub>3</sub>, SO<sub>2</sub>, CO, C<sub>6</sub>H<sub>6</sub> in connection with precipitation type and with air mass history

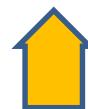

# Results

## Daily mean PM<sub>10</sub> and PM<sub>2.5</sub> mass concentrations over Bucharest; 2015-2019

### Urban area

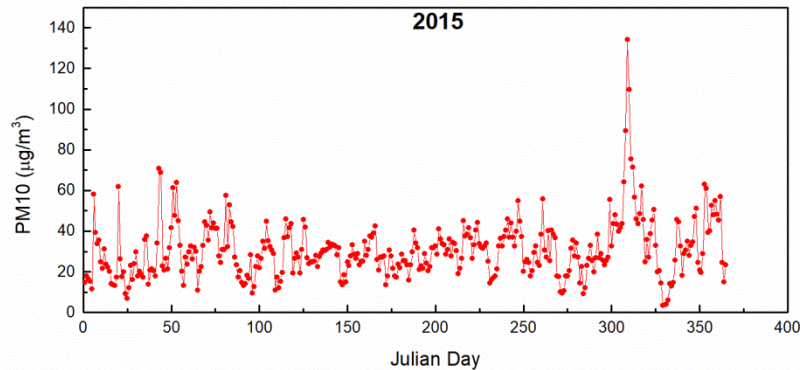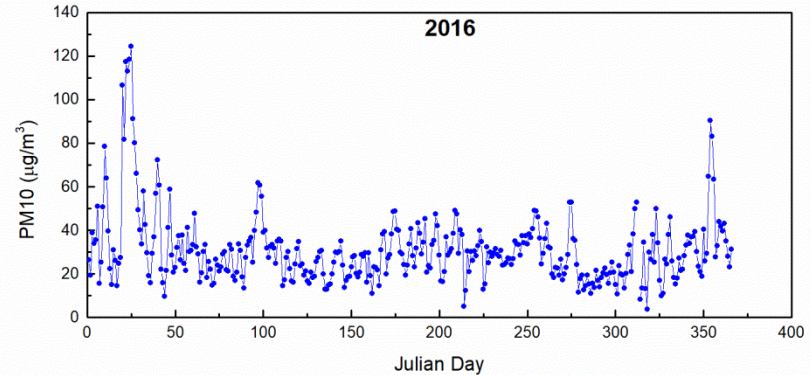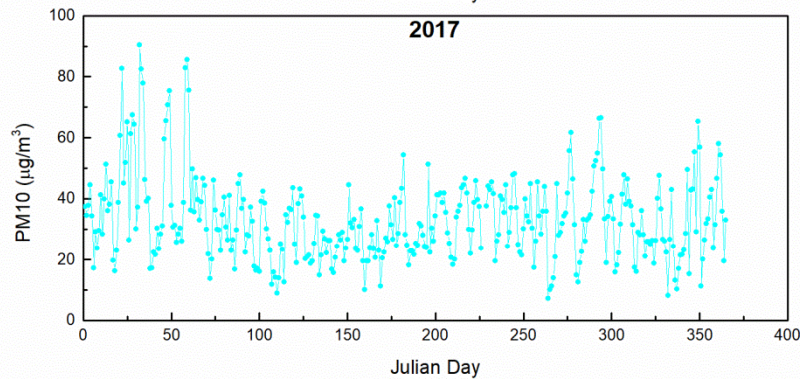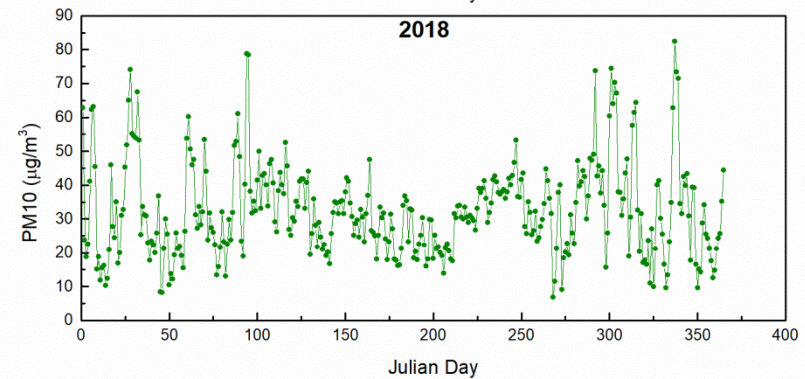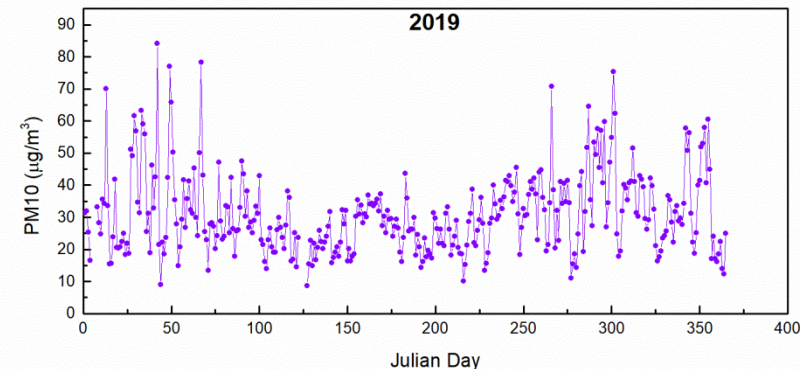

### PM<sub>2.5</sub>/PM<sub>10</sub>:

2016: 0.77 ( $R^2=0.73$ ),

2017: 0.63 ( $R^2=0.55$ ),

2018: 0.79 ( $R^2=0.79$ )

2019: 0.88 ( $R^2=0.94$ )

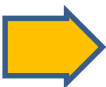

# Results

## Daily mean PM<sub>10</sub> and PM<sub>2.5</sub> mass concentrations over Bucharest; 2015-2019

### Suburban area

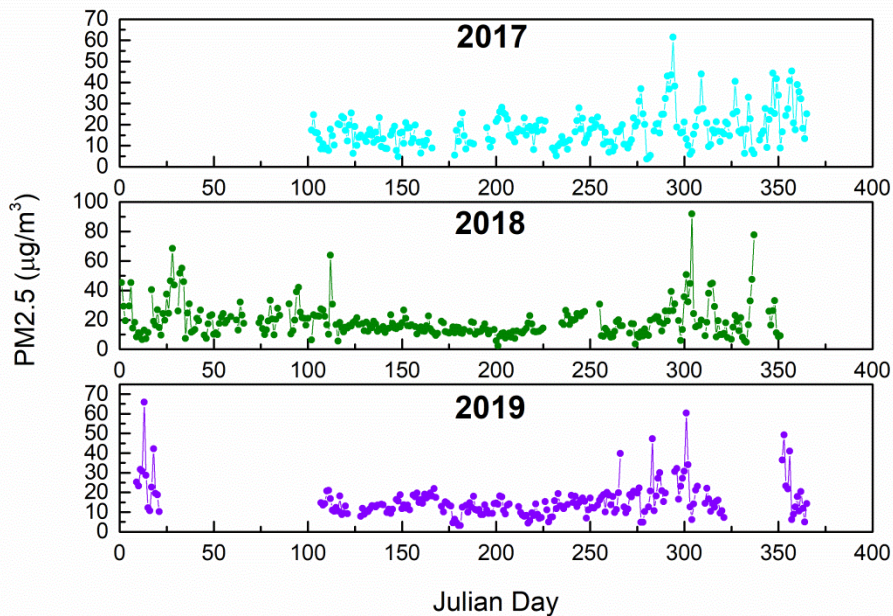

### Urban area

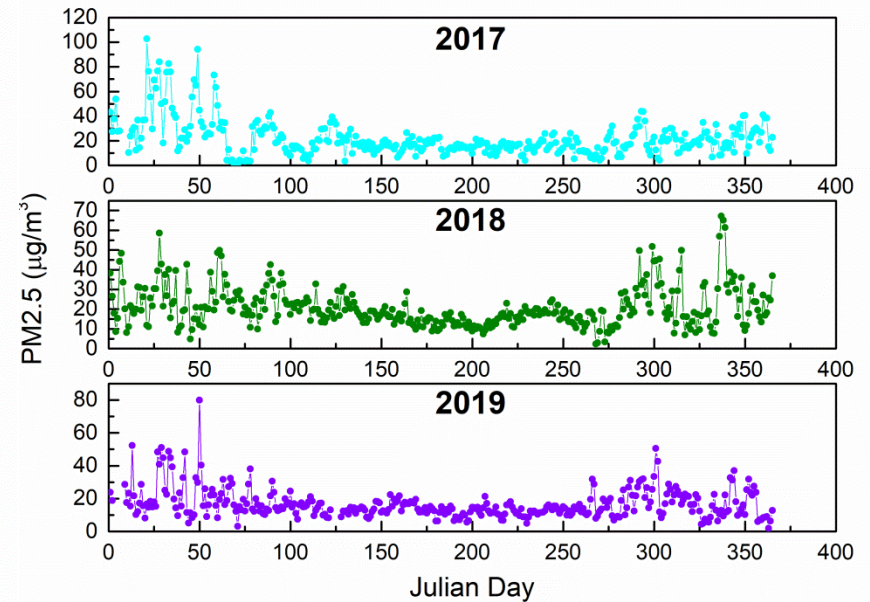

### PM<sub>2.5</sub>/PM<sub>10</sub>:

2016: 0.77 (R<sup>2</sup>=0.73),

2017: 0.63 (R<sup>2</sup>=0.55),

2018: 0.79 (R<sup>2</sup>=0.79)

2019: 0.88 (R<sup>2</sup>=0.94)



# Results

# Daily mean NOx mass concentrations over Bucharest; 2015-2019

## Suburban area

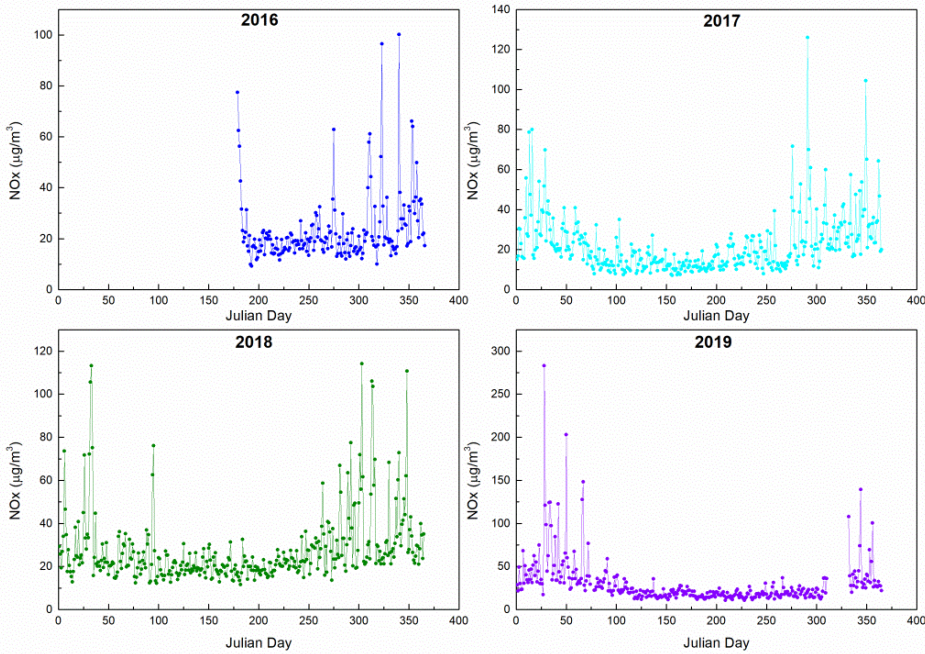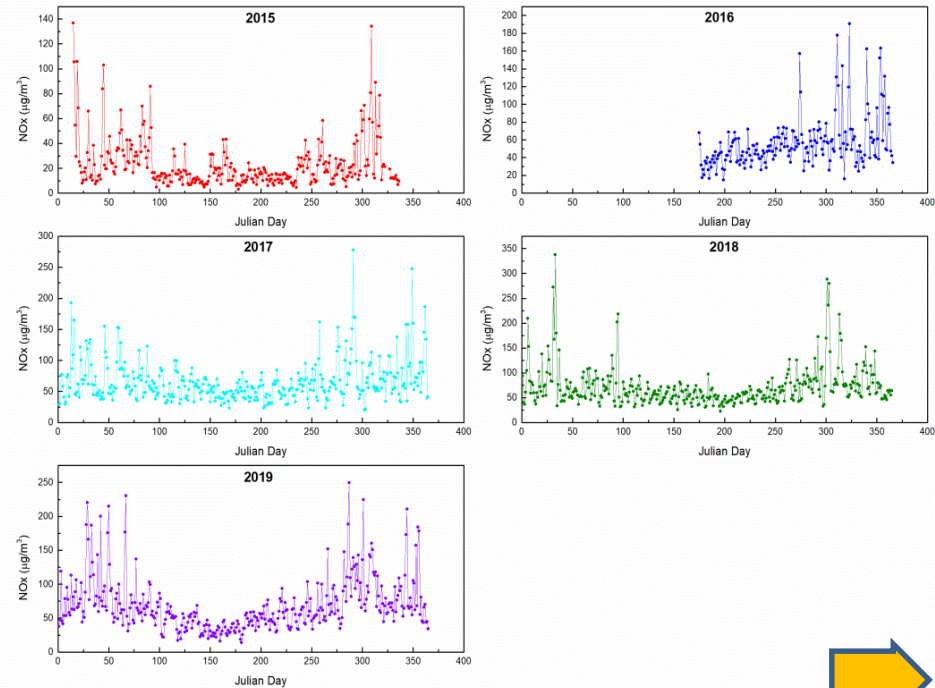

## Urban area

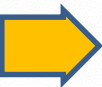



# Results

## Precipitations by type during convective seasons 2015-2019

RADAR Z-R relationship:  $Z = a R^b$  RADAR reflectivity Z (dBZ), Rain Rate (mm h<sup>-1</sup>), Stull (2000) classification

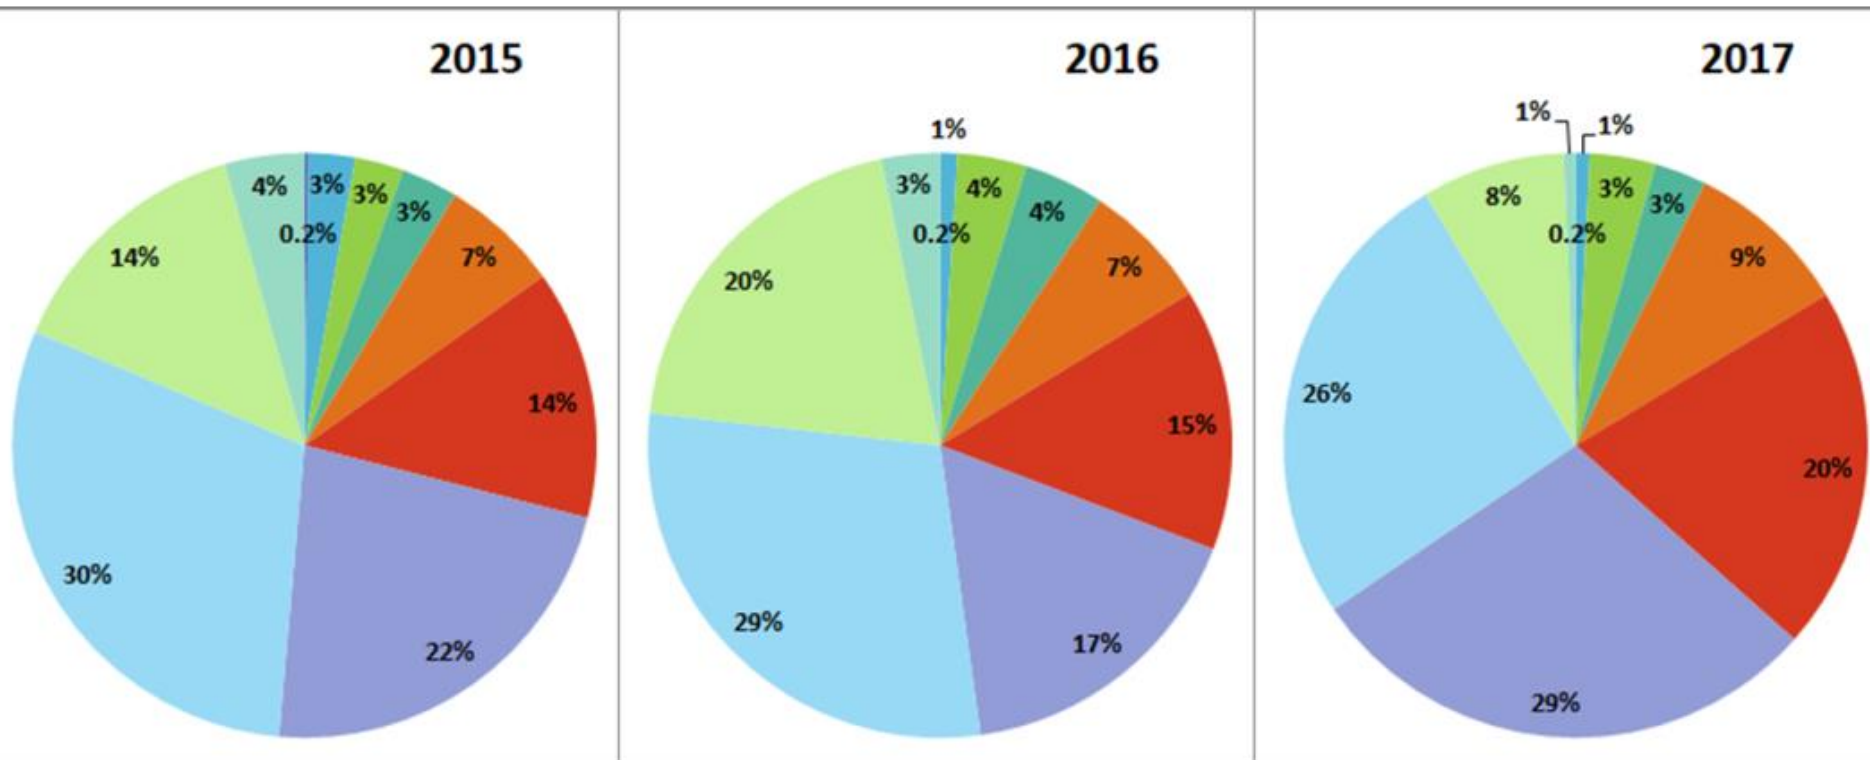

- Extreme/large hail
- Very heavy/small hail
- Moderate to heavy
- Light to moderate
- Very light
- Extreme/moderate hail
- Heavy
- Moderate rain
- Light
- Mist



# Results

## Precipitations by type during convective seasons 2015-2019

RADAR Z-R relationship:  $Z = a R^b$  RADAR reflectivity Z (dBZ), Rain Rate (mm h<sup>-1</sup>), Stull (2000) classification

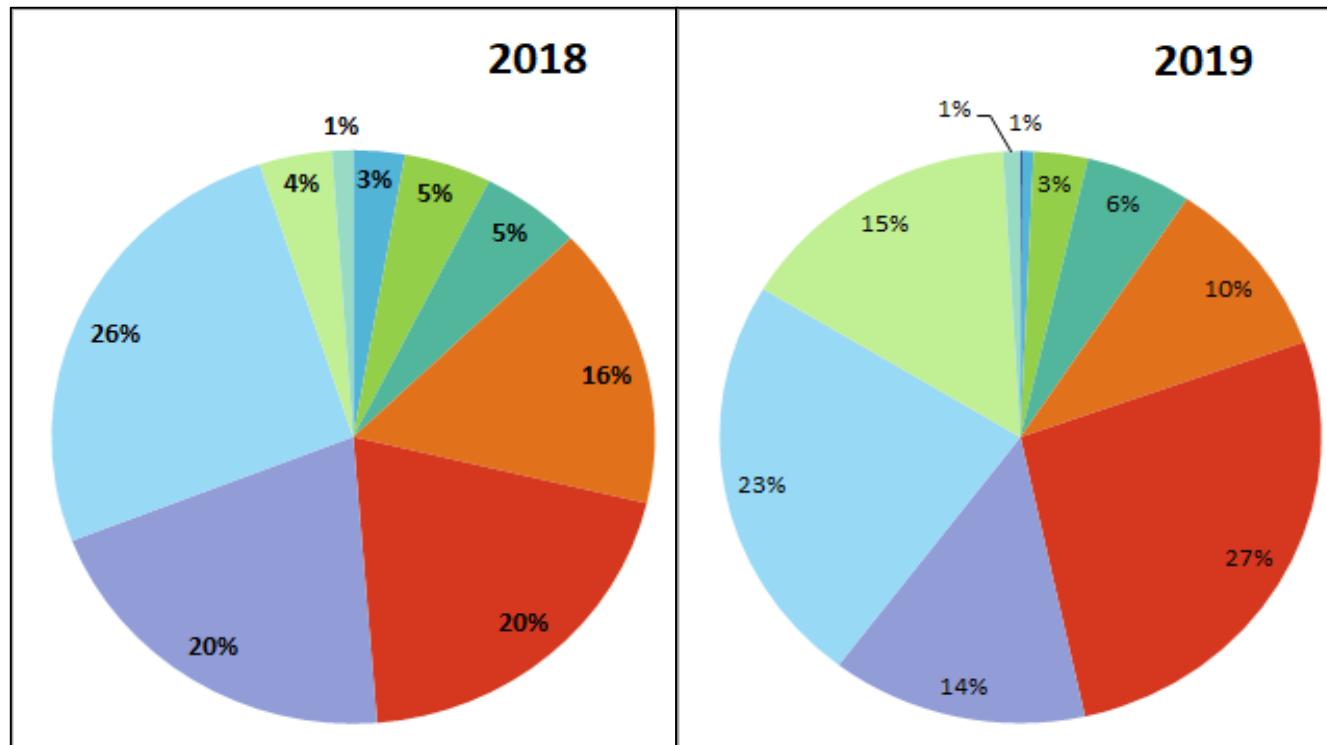

- Extreme/large hail
- Extreme/moderate hail
- Very heavy/small hail
- Heavy
- Moderate to heavy
- Moderate rain
- Light to moderate
- Light
- Very light
- Mist

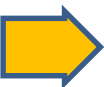

# Results

## Scavenging Coefficient: determination and comparisons

Scavenging coefficient  $\Lambda$ : 
$$\frac{dC}{dt} = -\Lambda C$$

**C= particulate matter concentration ( $\mu\text{g m}^{-3}$ ); t=time ( $\text{h}^{-1}$ )**

| $\Lambda$ ( $\text{h}^{-1}$ )               | Reference                                                                          | Observations                            |
|---------------------------------------------|------------------------------------------------------------------------------------|-----------------------------------------|
| $3.36 \times 10^{-5}$                       | Webster and Thomson (2014)                                                         | in-cloud                                |
| $8.4 \times 10^{-5}$                        | Webster and Thomson (2014)                                                         | below cloud                             |
| $2.3 \times 10^{-6} - 8.4 \times 10^{-5}$   | Zikova and Zdimal (2016)                                                           | 10-800 nm                               |
| $1.1 \times 10^{-5} - 7.6 \times 10^{-4}$   | Chate and Pranesha (2004)                                                          | 13-750 nm                               |
| $5.9 \times 10^{-6} - 1.4 \times 10^{-5}$   | Maria and Russell (2005)                                                           | 10-20000 nm                             |
| $6.2 \times 10^{-5} - 3.0 \times 10^{-4}$   | Depuydt et al. (2013)                                                              | 250-32000 nm                            |
| $3.29 \times 10^{-3} - 4.71 \times 10^{-3}$ | Hriscan et al. (2019)                                                              | long, intense<br>(7-8 consecutive days) |
|                                             | Examples from this study,<br>focus on long ( $>24 \text{ h}^{-1}$ ) precipitations |                                         |
| $8.50 \times 10^{-4}$                       | intense / heavy (30 h, July 2017)                                                  |                                         |
| $3.19 \times 10^{-3}$                       | light / moderate (26 h, May 2017)                                                  |                                         |



# Results

## Connections to meteorological phenomena occurrence and air mass history

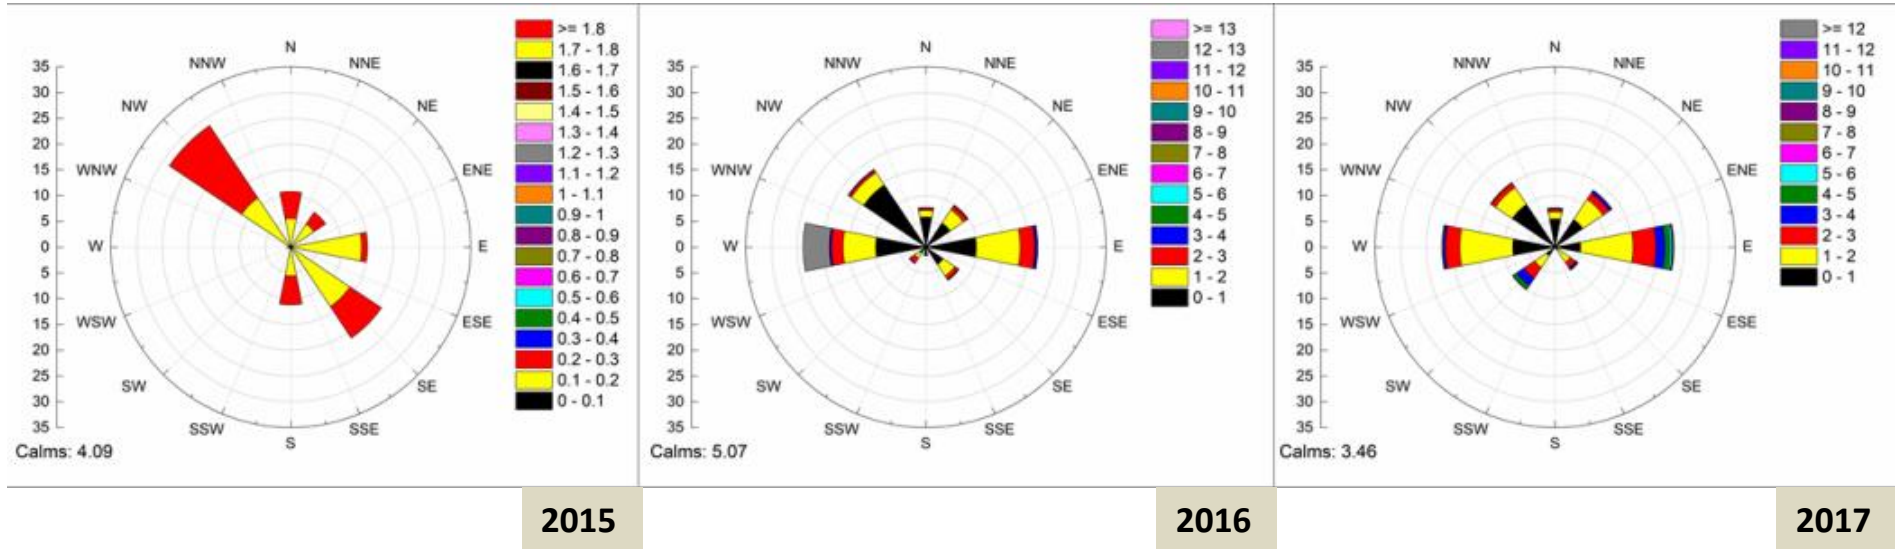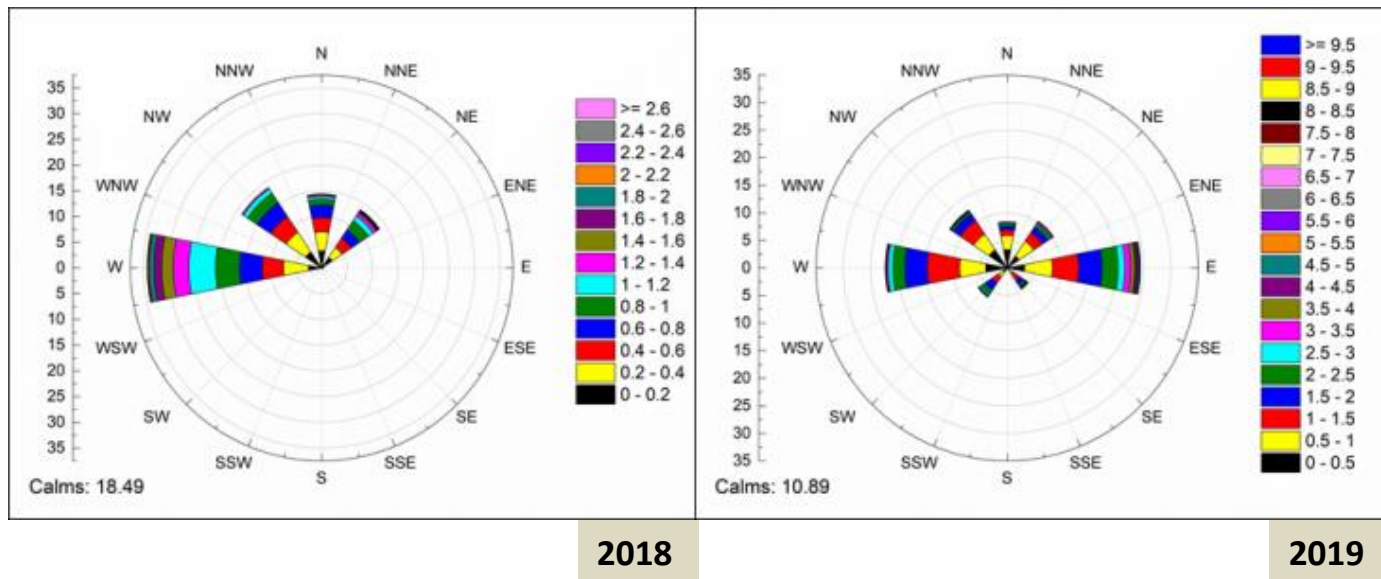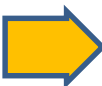

# Results

# Connections to meteorological phenomena occurrence and air mass history

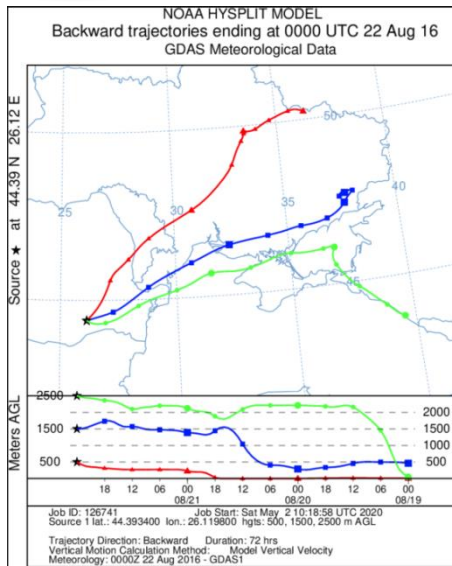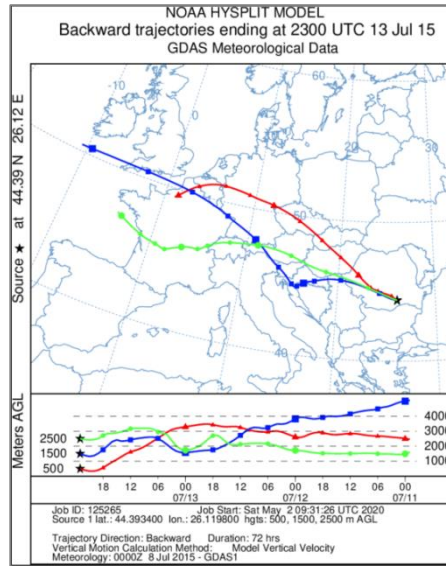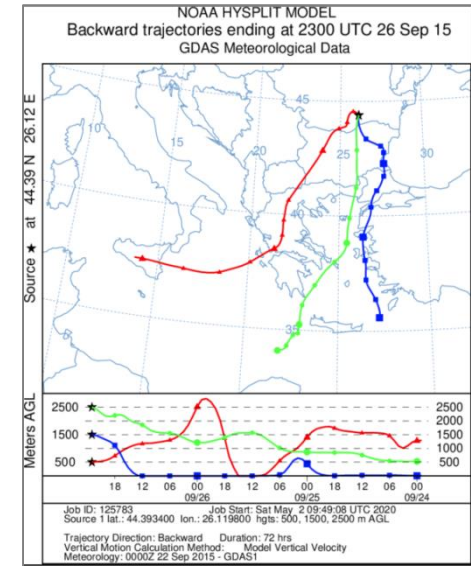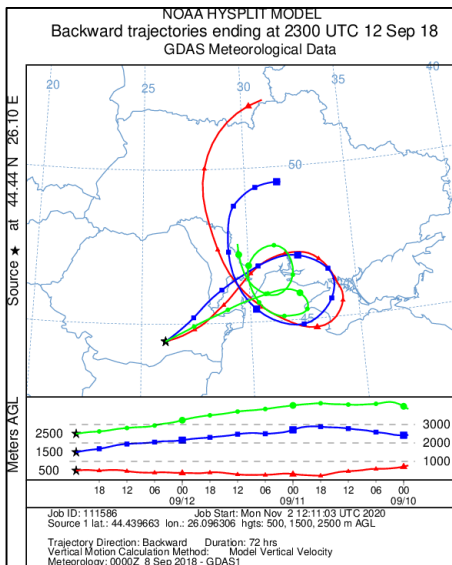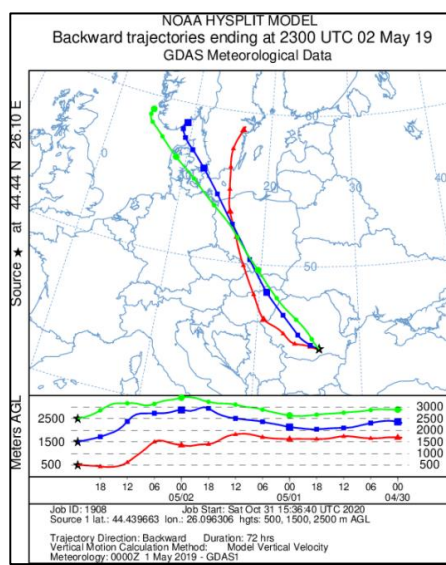

Examples of typical air mass back trajectories

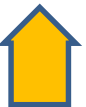

# Conclusions

- We observed  $PM_{10}$  levels exceeded frequently the daily limit value of  $50 \mu\text{g m}^{-3}$  imposed by the EU legislation; even peaks of about 2.5 times higher were observed. Both  $PM_{10}$  and  $PM_{2.5}$  presented higher values during the wintertime and generally higher values in 2015, 2016, 2017 and 2019 than in 2017. A large fraction of fine particles is present in PM.
- The annual mean mass concentrations of gaseous pollutants showed variations as follows:  $NO_x$  values are two times higher in the urban versus suburban area, while  $O_3$ ,  $C_6H_6$ , and  $SO_2$  values have the same level during 2015-2019.
- Type of precipitation has a strong influence on the atmospheric aerosol concentrations: intense and heavy precipitation determined an increased value of scavenging coefficient with up to one order of magnitude higher than in case of a moderate precipitation.
- Assessment of mean scavenging coefficient for Bucharest Greater area has been performed for the first time.
- Present results show a good capability of the convective precipitating systems to clear the atmosphere from aerosol over Bucharest Greater Area.

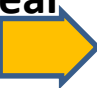

## Acknowledgements

The authors thank the financial support from EEA-RO-NO-2019-0432 project, contract 31/01.09.2020, and UB198 project and to National Meteorological Administration for access to the RADAR *database*. NOAA Air Resources Laboratory for HYSPLIT transport model available at READY website <https://www.ready.noaa.gov> is also acknowledged. The data regarding ground-based air pollution and local meteorology by site was extracted from the public available Romanian National Air Quality Database, [www.calitateaer.ro](http://www.calitateaer.ro), last accessed in August 2020.

**Thank you!**

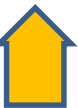

Supplement: s1 [file s1]
